# Supplementary material
Source: PubMed Central journal article supplement (PMC9020204)

## Pedi-PreSTO Pediatric Patient-Reported Symptom Tracking in Oncology (IRB 17-014139 ) EXAMPLE, MRN: EXAMPLE Symptom Report EXAMPLE

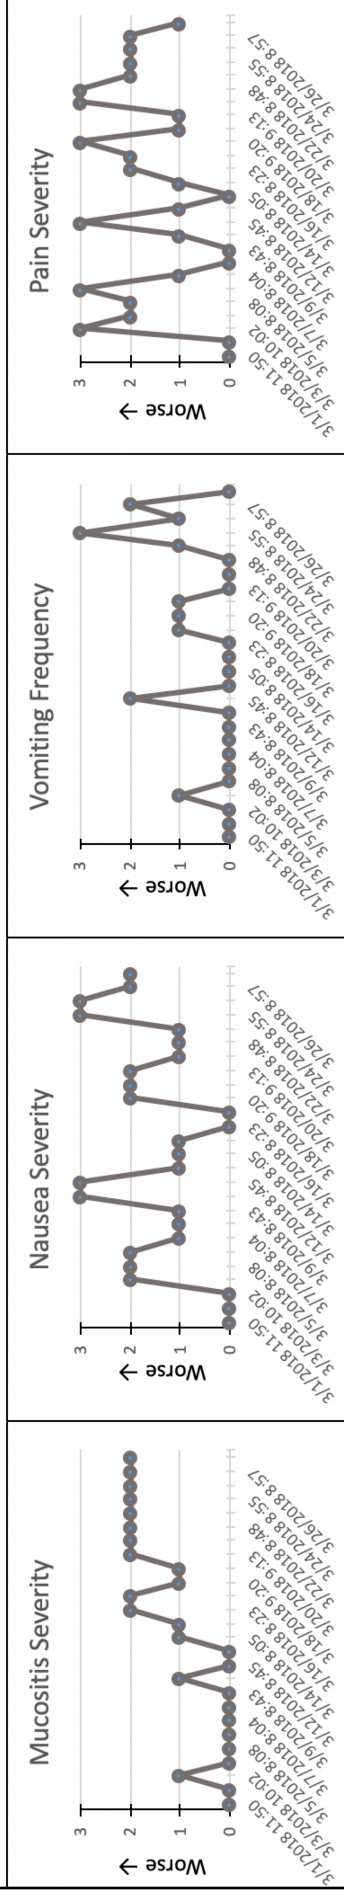

| Date             | Responder | Mucositis |   |   | Nausea |   |   | Vomiting |   |   | Fatigue |   |   | Pain |   |   | Anorexia |   |   | Constipation |   |   | Diarrhea |   |   | Headache |   |   | Insomnia |  |  |
|------------------|-----------|-----------|---|---|--------|---|---|----------|---|---|---------|---|---|------|---|---|----------|---|---|--------------|---|---|----------|---|---|----------|---|---|----------|--|--|
|                  |           | F         | S | I | F      | S | I | F        | S | I | F       | S | I | F    | S | I | F        | S | I | F            | S | I | F        | S | I | F        | S | I |          |  |  |
| 3/27/18 8:47 AM  | Proxy     | 3         | 3 | 3 | 3      | 2 | 2 | 0        | - | 2 | 2       | 2 | 1 | 2    | 1 | 3 | 3        | 3 | 2 | 1            | 0 | 0 | 0        | 0 | 0 | 0        | 0 | 0 | 0        |  |  |
| 3/27/18 8:39 AM  | Pt        | 3         | 2 | 2 | 2      | 2 | 1 | 0        | - | 0 | -       | 3 | 1 | 0    | 3 | 1 | 0        | 0 | 0 | 0            | 0 | 0 | 0        | 0 | 0 | 0        | 0 | 0 |          |  |  |
| 3/26/18 8:57 AM  | Pt        | 3         | 2 | 1 | 2      | 2 | 1 | 2        | 1 | 0 | -       | 3 | 2 | 1    | 3 | 2 | 1        | 0 | 0 | 0            | 0 | 0 | 0        | 0 | 0 | 0        | 0 | 0 |          |  |  |
| 3/26/18 8:42 AM  | Proxy     | 2         | 2 | 2 | 3      | 3 | 3 | 2        | 3 | 2 | 2       | 2 | 2 | 2    | 2 | 3 | 3        | 2 | 1 | 0            | 0 | 0 | 0        | 0 | 0 | 0        | 0 | 0 |          |  |  |
| 3/25/18 11:26 AM | Proxy     | 2         | 2 | 3 | 3      | 3 | 3 | 1        | 3 | 2 | 2       | 2 | 2 | 2    | 2 | 3 | 3        | 1 | 0 | 0            | 0 | 0 | 0        | 0 | 0 | 0        | 0 | 0 |          |  |  |
| 3/25/18 10:39 AM | Pt        | 2         | 2 | 2 | 3      | 3 | 3 | 1        | 2 | 2 | 2       | 2 | 2 | 2    | 2 | 3 | 3        | 1 | 0 | 0            | 0 | 0 | 0        | 0 | 0 | 0        | 0 | 0 |          |  |  |
| 3/24/18 8:55 AM  | Pt        | 3         | 2 | 1 | 3      | 3 | 2 | 3        | 1 | 2 | 1       | 2 | 1 | 3    | 2 | 1 | 0        | 0 | 0 | 0            | 0 | 0 | 0        | 0 | 0 | 0        | 0 | 0 |          |  |  |
| 3/24/18 8:17 AM  | Proxy     | 3         | 2 | 2 | 3      | 3 | 3 | 2        | 3 | 2 | 2       | 2 | 2 | 2    | 2 | 3 | 2        | 1 | 0 | 0            | 0 | 0 | 0        | 0 | 0 | 0        | 0 | 0 |          |  |  |
| 3/23/18 8:14 AM  | Pt        | 3         | 2 | 1 | 1      | 1 | 1 | 1        | 1 | 2 | 0       | 2 | 2 | 2    | 1 | 0 | 1        | 0 | 0 | 0            | 0 | 0 | 0        | 0 | 0 | 0        | 0 | 0 |          |  |  |

**Legend:**  
 F: Frequency  
 S: Severity  
 I: Interference, reported as "bother" by the patient

0 = None  
 1 = Mild  
 2 = Moderate  
 3 = Severe

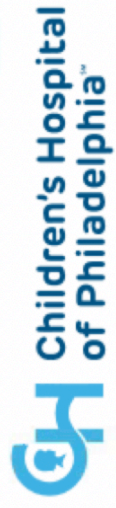

Supplement: NIHMS1795814-supplement-Online_only_Figure_1.pdf [file NIHMS1795814-supplement-Online_only_Figure_1.pdf]
