# Supplementary material
Source: PubMed Central journal article supplement (PMC9020204)
Supplement: NIHMS1795814-supplement-Online_online_Figure_4.pdf [file NIHMS1795814-supplement-Online_online_Figure_4.pdf]

**The first question asks about you:**

What best describes your healthcare provider role?

- Nurse Practitioner
- Hospitalist
- Attending
- Fellow
- Resident
- Other

You selected "other." Please describe your healthcare provider role: \_\_\_\_\_

**The remaining questions ask about your experience with the patient-reported symptom reports:**

For your reference, a sample symptom report is included below.

**Pedi-PreSTO Pediatric Patient-Reported Symptom Tracking in Oncology (IRB 17-014139 )**  
Notta Realpatient, MRN: 00000000 Symptom Report Mar 9 2017

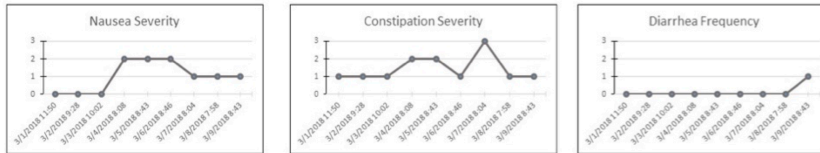

| Date           | Responder | Mucositis |   |   | Nausea |   |   | Vomiting |   |   | Fatigue |   |   | Pain |   |   | Anorexia |   |   | Constipation |   |   | Diarrhea |   |   | Headache |   |   | Insomnia |   |   |
|----------------|-----------|-----------|---|---|--------|---|---|----------|---|---|---------|---|---|------|---|---|----------|---|---|--------------|---|---|----------|---|---|----------|---|---|----------|---|---|
|                |           | F         | S | I | F      | S | I | F        | S | I | F       | S | I | F    | S | I | F        | S | I | F            | S | I | F        | S | I | F        | S | I |          |   |   |
| 3/9/18 8:43 AM | Pt        | 0         | - | - | 1      | 1 | 0 | -        | 1 | 0 | 0       | - | - | 3    | 1 | 1 | 1        | 1 | 0 | 1            | 1 | 0 | 0        | 0 | 0 | -        | - | 0 | -        | - | - |
| 3/9/18 8:15 AM | Proxy     | 0         | - | - | 3      | 2 | 2 | 0        | - | 2 | 2       | 1 | 1 | 1    | 1 | 2 | 3        | 2 | 1 | 0            | - | 0 | -        | - | 0 | -        | - | 1 | 1        | 1 | 1 |
| 3/8/18 8:00 AM | Proxy     | 0         | - | - | 2      | 2 | 2 | 0        | - | 2 | 2       | 1 | 1 | 1    | 1 | 3 | 2        | 2 | 1 | 0            | - | 1 | 1        | 1 | 1 | 1        | 1 | 1 | 1        | 1 | 1 |
| 3/8/18 7:58 AM | Pt        | 0         | - | - | 1      | 1 | 1 | 0        | - | 1 | 1       | 0 | - | -    | 3 | 1 | 1        | 0 | 0 | 0            | - | 0 | -        | - | 0 | -        | - | 0 | -        | - | - |
| 3/7/18 8:24 AM | Proxy     | 0         | - | - | 2      | 2 | 2 | 0        | - | 1 | 1       | 1 | 1 | 1    | 1 | 2 | 3        | 3 | 2 | 0            | - | 1 | 1        | 1 | 1 | 1        | 1 | 1 | 1        | 1 | 1 |
| 3/7/18 8:04 AM | Pt        | 0         | - | - | 1      | 1 | 1 | 0        | - | 1 | 1       | 2 | 1 | 1    | 1 | 3 | 3        | 0 | 0 | 0            | - | 0 | -        | - | 0 | -        | - | 0 | -        | - | - |
| 3/6/18 8:46 AM | Pt        | 0         | - | - | 2      | 2 | 1 | 0        | - | 1 | 1       | 3 | 3 | 2    | 1 | 3 | 1        | 0 | 0 | 0            | - | 2 | 2        | 1 | 0 | -        | - | - | -        | - | - |
| 3/5/18 8:57 AM | Pt        | 0         | - | - | 1      | 2 | 1 | 0        | - | 1 | 1       | 2 | 2 | 0    | 0 | 2 | 2        | 0 | 0 | -            | - | 1 | 2        | 1 | 0 | -        | - | - | -        | - | - |
| 3/5/18 8:56 AM | Proxy     | 0         | - | - | 2      | 2 | 2 | 0        | - | 1 | 1       | 2 | 1 | 1    | 2 | 3 | 2        | 1 | 0 | -            | - | 1 | 2        | 1 | 1 | 1        | 1 | 1 | 1        | 1 | 1 |
| 3/4/18 8:08 AM | Proxy     | 2         | 2 | 2 | 3      | 3 | 3 | 1        | 2 | 3 | 2       | 3 | 3 | 3    | 3 | 3 | 3        | 2 | 2 | 0            | - | 1 | 1        | 1 | 2 | 2        | 2 | 2 | 2        | 2 | 2 |
| 3/4/18 8:08 AM | Pt        | 0         | - | - | 1      | 2 | 1 | 1        | 1 | 1 | 0       | 1 | 2 | 1    | 2 | 3 | 2        | 0 | 0 | -            | 0 | - | -        | 0 | - | -        | 0 | - | -        | - |   |

**Legend:**  
F: Frequency  
S: Severity  
I: Interference, reported as "bother" by the patient  
0 = None  
1 = Mild  
2 = Moderate  
3 = Severe

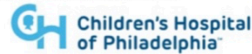

**Please indicate your level of agreement with the following statements:**

It is easy to understand the symptom reports.

- Not at all
- A little
- Somewhat
- A lot
- Completely

I think that reviewing the symptom reports is useful.

- Not at all
- A little
- Somewhat
- A lot
- Completely

If given the choice, I would like to continue receiving symptom reports after the completion of the study period.

- Not at all
- A little
- Somewhat
- A lot
- Completely

Are there aspects of this research study and/or the symptom reports that you think are especially good or bad? If so, what were they? \_\_\_\_\_

If you find the symptom reports helpful, please share how you find them helpful. If you do not find them helpful, please share why you feel they are not: \_\_\_\_\_

Are there any challenges associated with reviewing the symptom reports? If so, what are they? \_\_\_\_\_

Are there any unexpected benefits from reviewing the reports? If so, what are they? \_\_\_\_\_

Any additional comments: \_\_\_\_\_
