# Supplementary material
Source: PubMed Central journal article supplement (PMC9020204)
Supplement: NIHMS1795814-supplement-Online_only_Figure_3.pdf [file NIHMS1795814-supplement-Online_only_Figure_3.pdf]

*In response to the prompt: What did you like about answering question about your feelings in this way?*

- It's like homework, I love it! (7yo boy)
- Helped get cared for and it made me feel better (8yo girl)
- Nothing (9yo girl)
- I liked that it helped me prepare for the doctor's questions (12yo girl)
- It helped clear my mind and helped me to focus on how I felt (12yo boy)
- It informs your doctors about what's going on (13yo boy)
- I just liked it... (14yo girl)
- It was very simple and helped me understand that other patients go through the same things as me (14yo girl)
- It was easy to tell the doctors your symptoms. (15yo girl)
- I get an idea of what I need to focus on for my health. (15yo girl)
- Able to express my feelings (17yo boy)
- It was extremely easy and efficient (17yo boy)
- Depending on how me and my mother responded it started conversations with the doctor (16yo boy)
- It helped me notice my symptoms (18yo boy)
- Connected more with the diagnosis and felt more empowered on how to cope and help with it (18yo girl)

*In response to the prompt: What did you not like about answering question about your feelings in this way?*

- Everything (9yo girl)
- It made me think what I have been through (11yo boy)
- Nothing (12yo boy)
- I don't have any problems with it. It was fine. (12yo girl)
- You have to do it everyday (13yo boy)
- Everything was fine. (14yo girl)
- I don't mind reporting my symptoms (15yo girl)
- It was fine didn't have any problems with it (15yo girl)
- I liked it completely (16yo boy)
- I don't have any complaints (17yo boy)
- It took a while (18yo boy)
- Nothing was bad about it (18yo boy)
