# Supplementary material
Source: PubMed Central journal article supplement (PMC9020204)

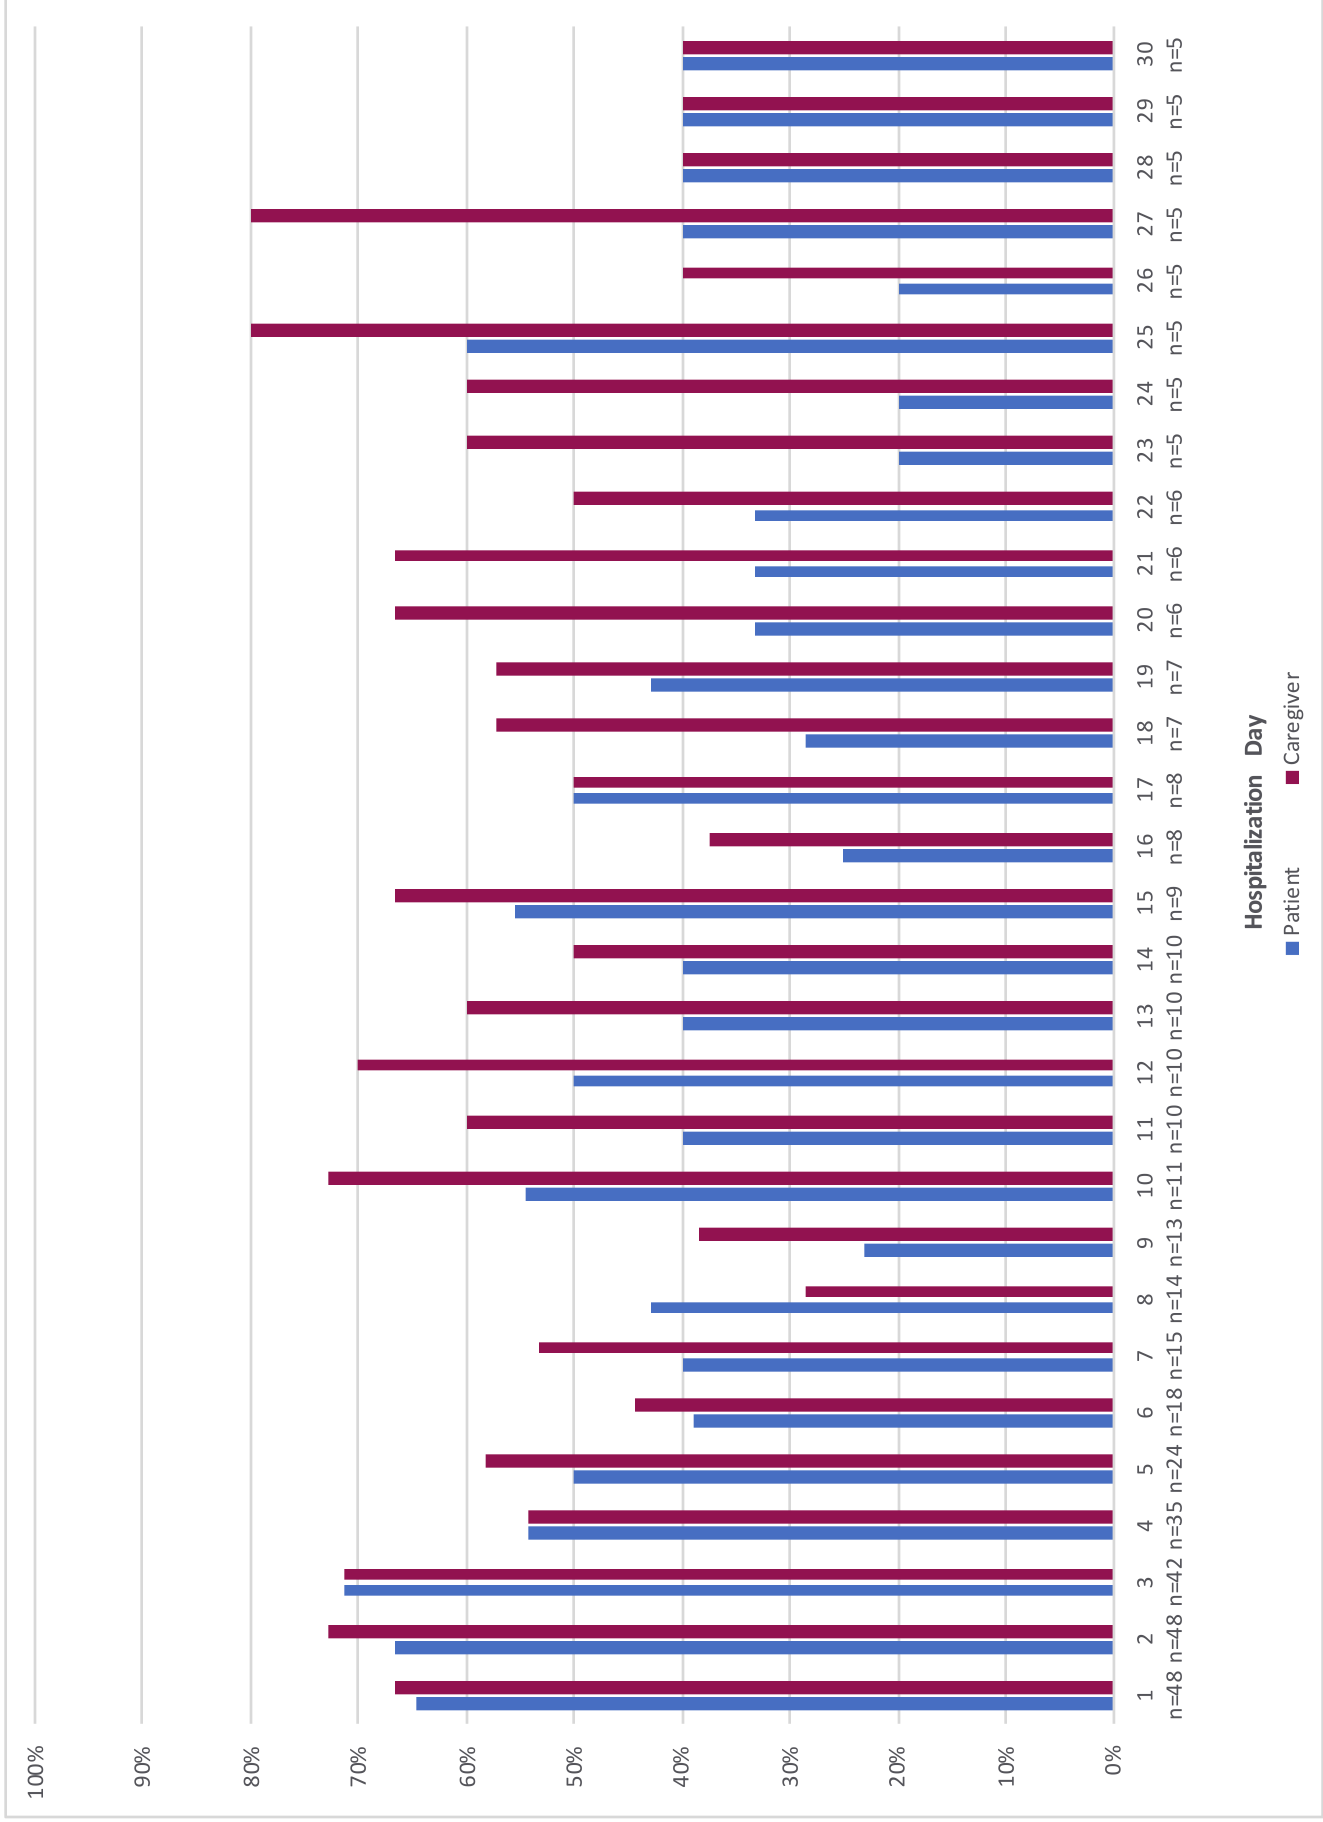

Supplement: NIHMS1795814-supplement-Online_only_Figure_2.pdf [file NIHMS1795814-supplement-Online_only_Figure_2.pdf]
